# Supplementary material for: Ferritin Heavy Subunit Silencing Blocks the Erythroid Commitment of K562 Cells via miR-150 up-Regulation and GATA-1 Repression
Source: Int J Mol Sci. 2017 Oct 17;18(10):2167. doi: 10.3390/ijms18102167 (PMC5666848; doi:10.3390/ijms18102167)
Supplement: Supplementary file 1 [file ijms-18-02167-s001.pdf]

# Supplementary Materials

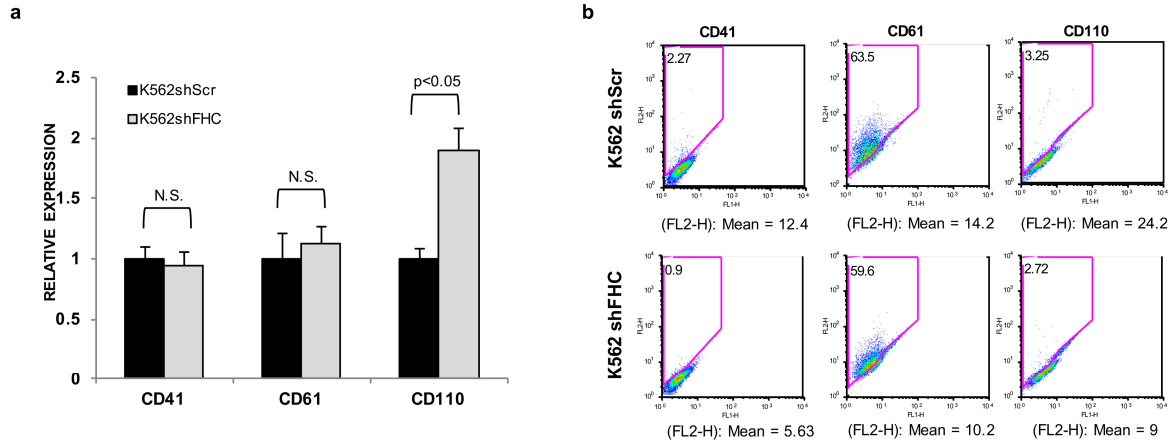

**Figure S1.** FHC silencing doesn't affect the expression of megakaryocytic markers. **(a)** Relative expression of *CD41*, *CD61* and *CD110* of K562<sup>shScr</sup> and K562<sup>shFHC</sup> cells. Data represent mean  $\pm$  SD ( $n=2$ ). N.S.: not significant; **(b)** Representative plots of two independent flow cytometry analyses of *CD41*, *CD61* and *CD110* surface expression in K562<sup>shScr</sup> and K562<sup>shFHC</sup> cells. Data are reported both as mean fluorescence intensity (FL2-H) and as percentage (%) of *CD41*<sup>+</sup>, *CD61*<sup>+</sup> and *CD110*<sup>+</sup> cells.

| miRNA          | mRNA      | Position | Structure                                                                                                | Loop Score | $\Delta G$ | Recommendation |
|----------------|-----------|----------|----------------------------------------------------------------------------------------------------------|------------|------------|----------------|
| hsa-miR-150-5p | NM_002032 | 38-73    | 3' GUGACCA--UGUUC-----CAACCCUCU 5'<br>**   ***   *****   :***<br>5' CCCTGGTCACCAAGGCAGTGCATGCTTGGGGTT 3' | 20.00      | -25.00     | excellent      |
| hsa-miR-150-5p | NM_002032 | 165-188  | 3' GUGACCAUGUUC--CAACCCUCU 5'<br>*****:    **   ***<br>5' GTTGCTTTGAGGTCTTGGGATG 3'                      | 20.00      | -16.60     | excellent      |

**Figure S2.** FHC mRNA-miR-150 complementary regions. FINDTAR3 online tool predicted two putative complementary regions between FHC mRNA and miR-150 (FHC mRNA (NM\_002032) positions: 38–73; 165–188).
